# Supplementary material
Source: PubMed Central journal article supplement (PMC4114950)
Supplement: supp_tpc.114.125187_tpc125187_Supplemental.pdf [file supp_tpc.114.125187_tpc125187_Supplemental.pdf]

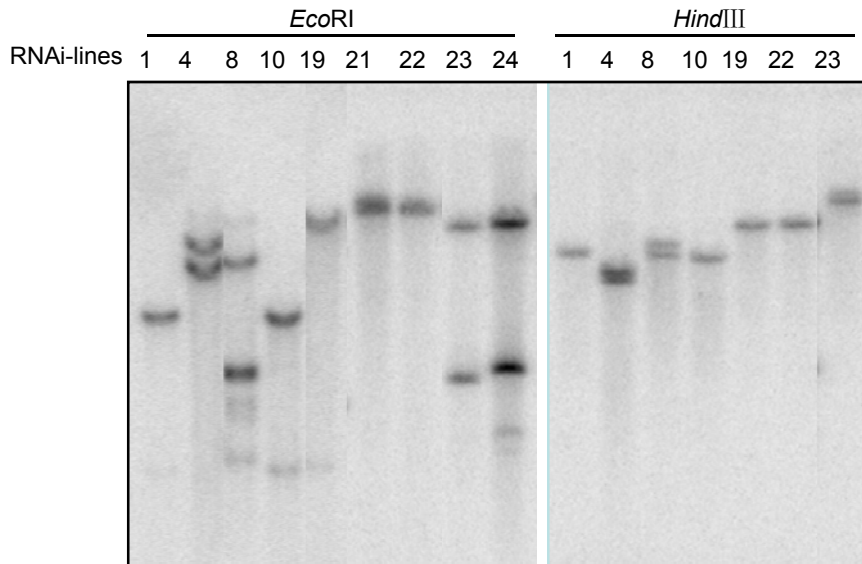

**Supplemental Figure 1.** DNA gel blot assay of *SIT1*-RNAi rice plants. Genomic DNA isolated from individual transgenic *SIT1*-RNAi plants was digested with *EcoRI* and *HindIII*. The blot was probed with an [ $\alpha$ - $^{32}$ P]dATP-nucleotide acid encoding a hygromycin-resistance gene.

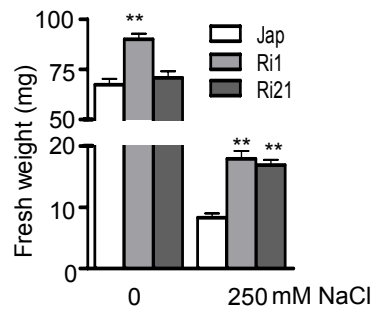

**Supplemental Figure 2.** The fresh weight of 20-day-old Ri1, Ri21, and wild-type (Jap) seedlings grown on 0.5×MS medium containing 0 or 250 mM NaCl.

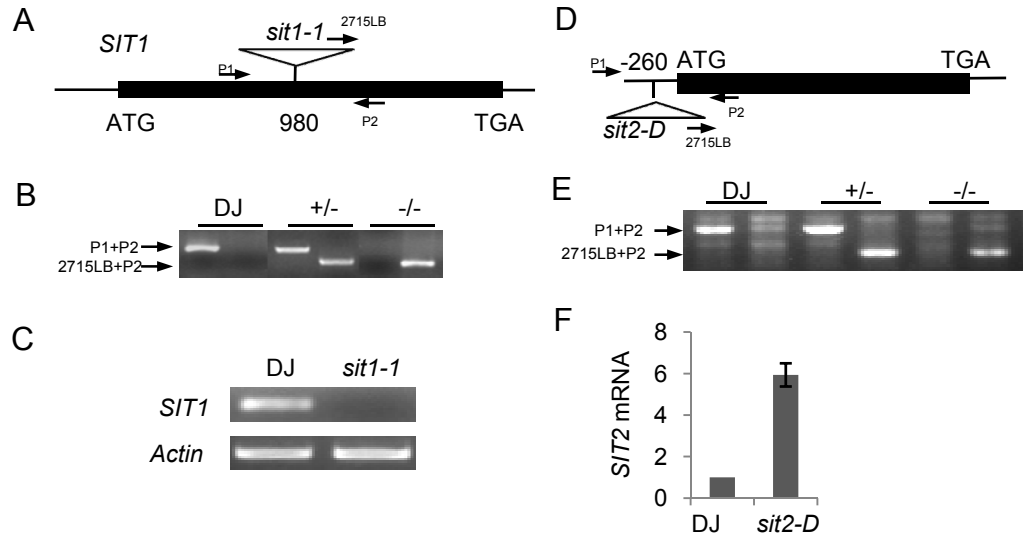

**Supplemental Figure 3.** Genotyping of the *sit1-1* and *sit2-D* mutants. **(A)** and **(D)** Schematic diagram of the T-DNA insertions in *sit1-1* **(A)** and *sit2-D* **(D)**. Black boxes represent coding sequences. Arrows indicate the primers (with the directions) used for PCR identification. Numbers indicate the T-DNA insertion sites. **(B)** and **(E)** Genotyping of *sit1-1* **(B)** and *sit2-D* **(E)** homozygous, heterozygous, and wild-type (DJ) plants. **(C)** and **(F)** RT-PCR **(C)** and qRT-PCR **(F)** revealed that the full-length transcript was absent in *sit1-1* **(C)** and increased in *sit2-D* due to 35S insertion (4×) in the promoter region **(F)**.

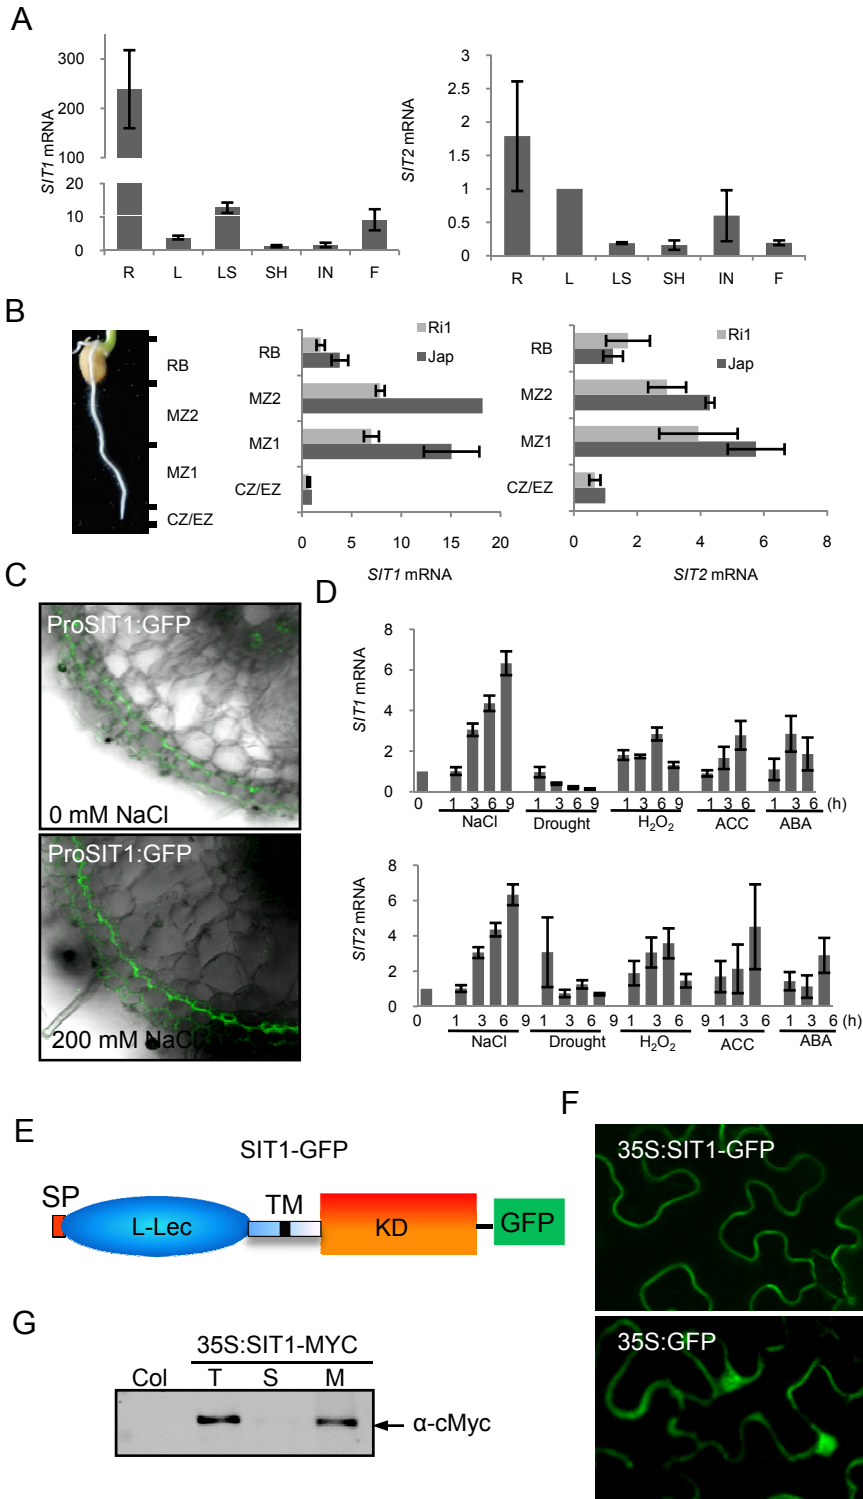

**Supplemental Figure 4.** Rice expression pattern of *SIT1* and *SIT2*. (A) Tissue-specific expression of *SIT1* and *SIT2*. R, root. L, leaf. SH, shoot. LS, leaf sheath. IN, internode. F, flower. (B) A five-day-old seminal root was divided into four zones (left panel) and the mRNA levels of *SIT1* and *SIT2* in each zone were determined. RB, root base; MZ, maturation zone; EZ/CZ, elongation zone and cell division zone. (C) Merged image of a transverse section of the mature zone of a rice seminal root harboring the *ProSIT1:GFP* reporter treated with or without NaCl for 6 h. (D) *SIT1* and *SIT2* expression in response to stress and phytohormone treatment. Two-week-old wild-type (Jap) roots were treated for the indicated time with 200 mM NaCl, drought (roots exposed to air without water), 100  $\mu$ M  $H_2O_2$ , 100  $\mu$ M ACC, and 30  $\mu$ M ABA, respectively. (E) Schematic representation of *SIT1* protein domain organization. SP, signal peptide; L-Lec, L-Lectin domain; TM, transmembrane domain; Ser/Thr kinase, serine and threonine kinase domain. (F) Subcellular localization of the *SIT1*-GFP fusion protein in tobacco epidermal cells. (G) Immunoblot assay of the *SIT1*-Myc fusion expressed in *Arabidopsis* leaves before and after cell fractionation. Wild-type Col was used as a control. T, total protein; S, soluble fraction; M, membrane fraction.

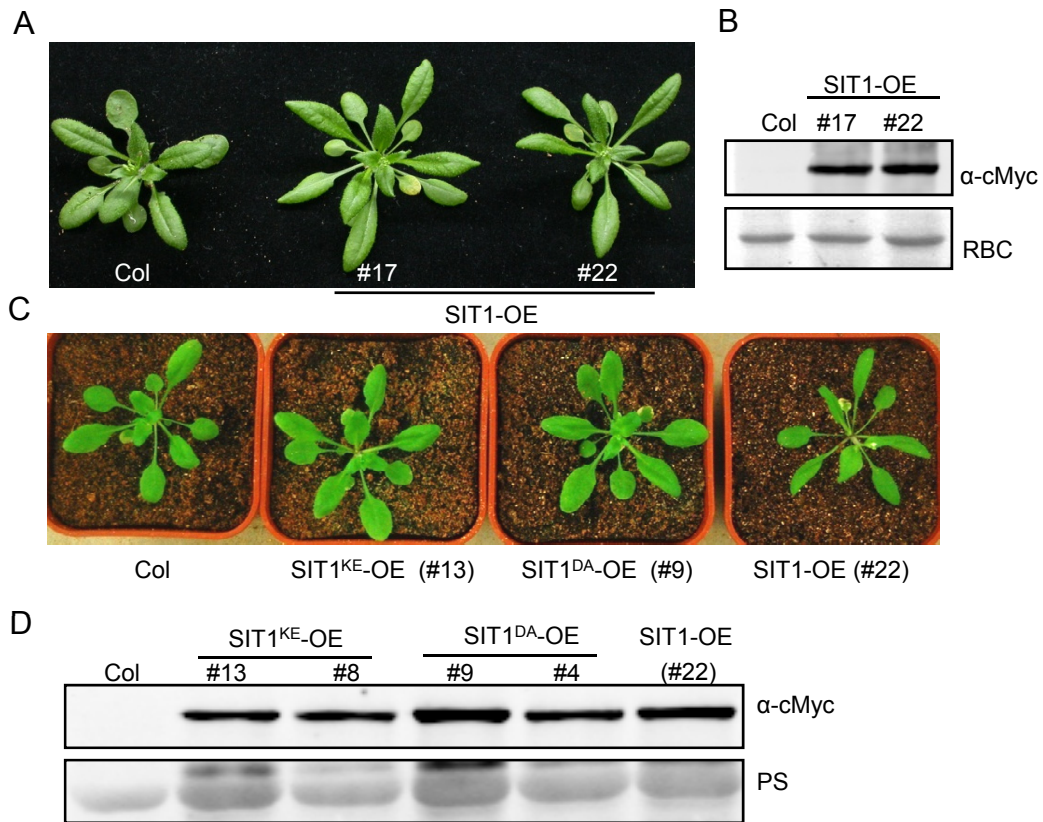

**Supplemental Figure 5.** Transgenic *Arabidopsis* overexpressing kinase-active, but not kinase-dead, SIT1 exhibited an obvious phenotype. **(A)** Two transgenic lines expressing wild-type *SIT1* showing narrow rosette leaves as compared with wild-type Col. Twenty-day-old seedlings grown under normal conditions were photographed. **(B)** Immunoblot assay of SIT1-Myc fusion protein expression in the transgenic *Arabidopsis* lines shown in **(A)**. **(C)** Phenotypic comparison of Col, SIT1-, SIT1<sup>KE</sup>-, and SIT1<sup>DA</sup>-OE seedlings. **(D)** Immunoblot assay of SIT1<sup>KE</sup>-, SIT1<sup>DA</sup>-, and SIT1-Myc fusion protein expression in the transgenic *Arabidopsis* seedlings shown in **(C)**. PS staining of Rubisco (RBC) indicates equal loading.

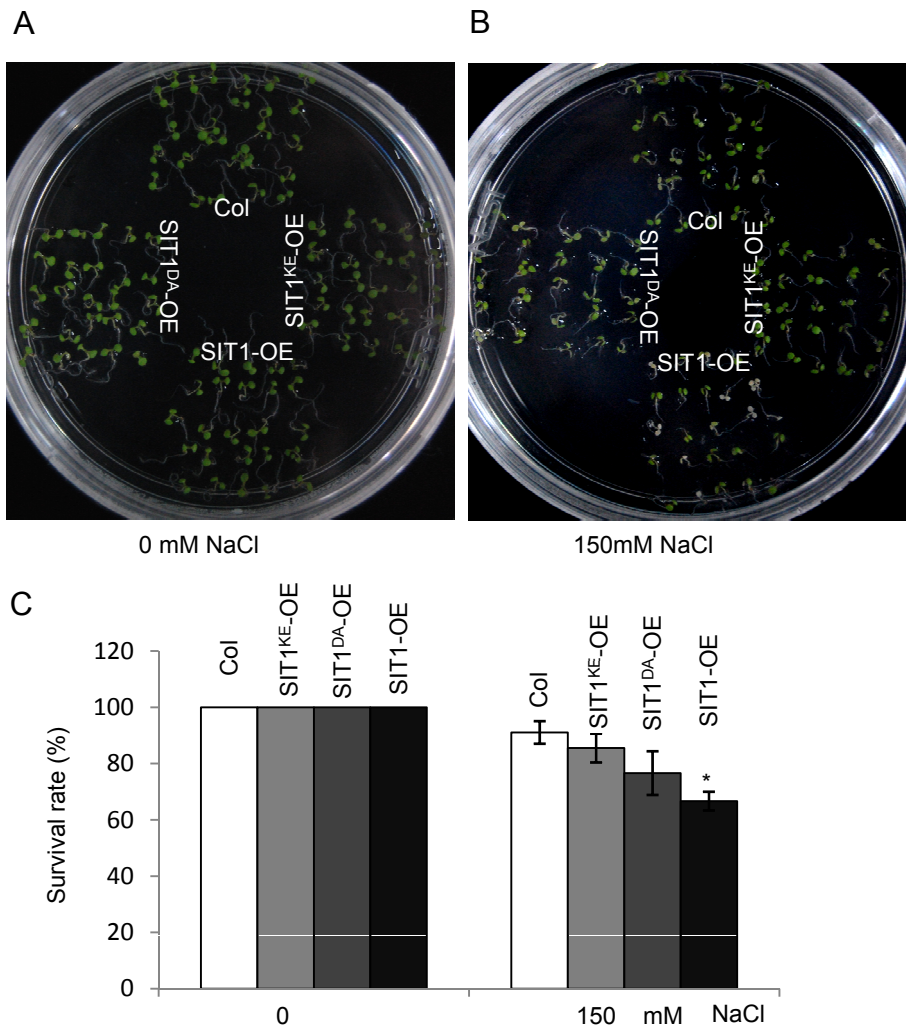

**Supplemental Figure 6.** Investigation of the survival rates of SIT1-OE, SIT1<sup>KE</sup>-OE, and SIT1<sup>DA</sup>-OE seedlings on 150 mM NaCl-containing medium. Seeds were sown on 0.5× MS medium and allowed to germinate for 3 days. The seedlings were then transferred to plates with or without 150 mM NaCl and allowed to grow for another 3 days. The survival rates were calculated and analyzed by Student's *t*-test. The data represent the mean ± SEM of three parallel experiments (n=30/genotype). a-c indicate significant differences.

**A**

|                          |   |   |   |   |   |
|--------------------------|---|---|---|---|---|
| GST-SIT1KD               | + | - | + | - | - |
| GST-SIT1KD <sup>KE</sup> | - | - | - | + | - |
| GST                      | - | - | - | - | + |
| CIP                      | - | - | + | - | - |
| MBP-MPK3                 | + | + | + | + | + |

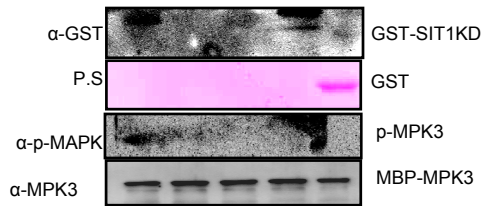

**B**

|                          |   |   |   |   |   |
|--------------------------|---|---|---|---|---|
| GST-SIT1KD               | + | - | + | - | - |
| GST-SIT1KD <sup>KE</sup> | - | - | - | + | - |
| GST                      | - | - | - | - | + |
| CIP                      | - | - | + | - | - |
| MBP-MPK6                 | + | + | + | + | + |

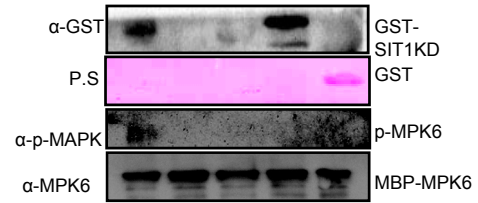

**Supplemental Figure 7.** SIT1 phosphorylates MPK3 (**A**) and MPK6 (**B**) *in vitro*. SIT1<sup>KE</sup>, although used in sufficient quantities, could not phosphorylate MPK3 or MPK6. Phospho-MPK3 or -MPK6 was probed for using anti-p-MAPK antibodies; non-phospho-MPK3 and -MPK6 were probed for using anti-MPK3 and anti-MPK6 antibodies, respectively.

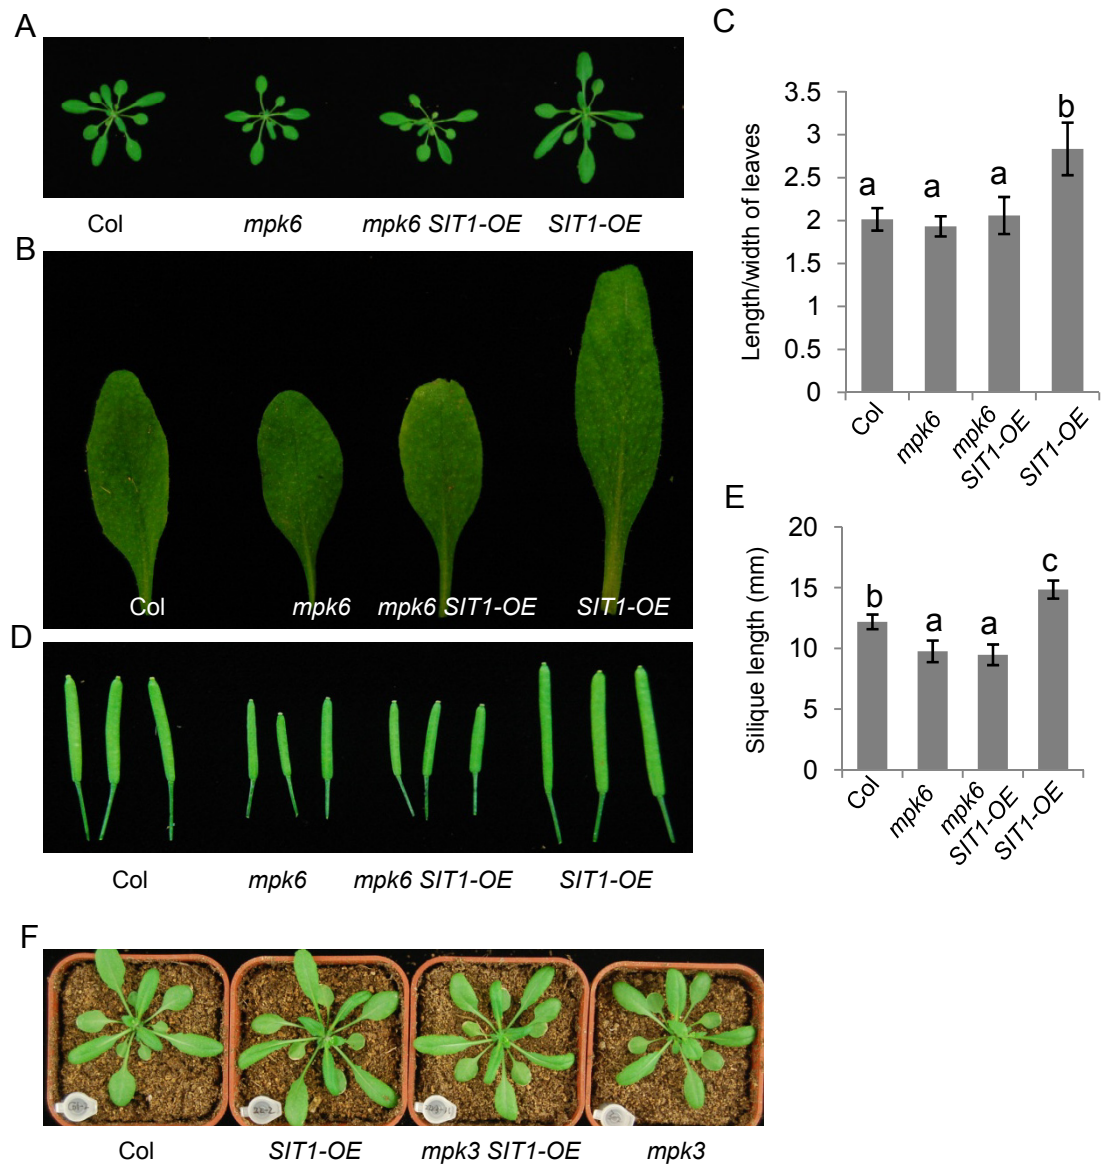

**Supplemental Figure 8.** Phenotypic comparison of the *Arabidopsis* mutants *mpk6* and *mpk3* with the double homozygotes *mpk6 SIT1-OE* and *mpk3 SIT1-OE*. **(A–E)** Cross of *mpk6* with *SIT1-OE* plants. **(A)** and **(B)** Rosette leaf morphology. **(C)** Length/width ratio of the leaves shown in **(B)**. **(D)** Silique morphology. **(E)** Lengths of the siliques shown in **(D)**. The data were analyzed by Student's *t*-test. Bars indicate the mean  $\pm$  SEM ( $n=20$ ). a–c indicate significant differences. **(F)** Cross of *mpk3* with *SIT1-OE* plants. Four-week-old seedlings were observed.



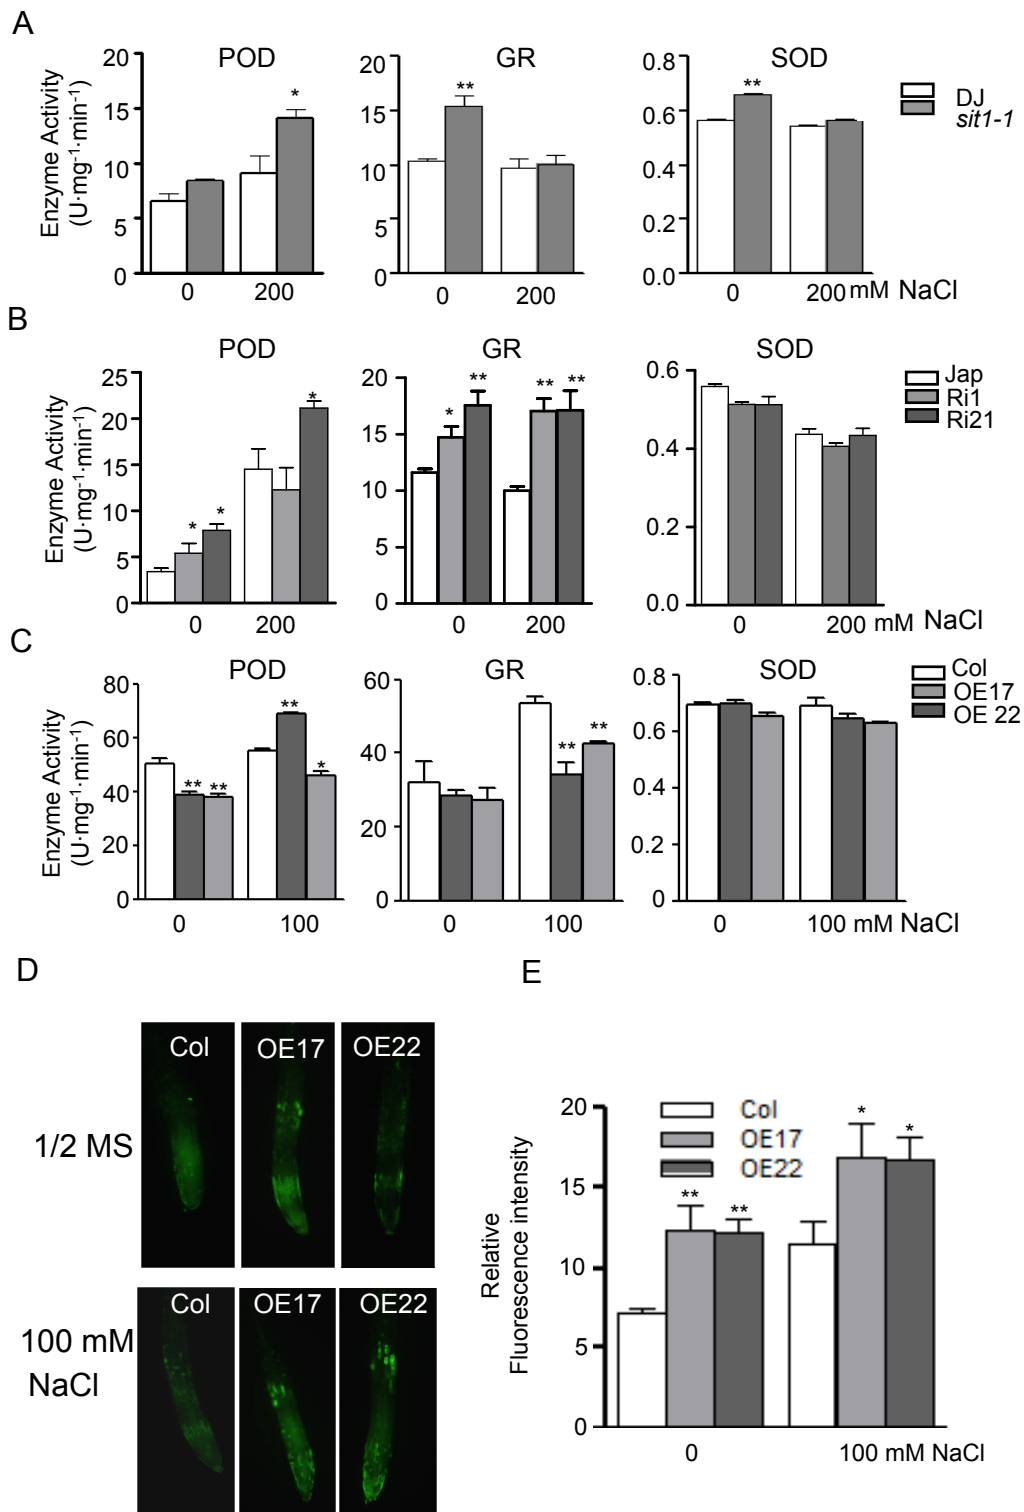

**Supplemental Figure 9.** Anti-oxidase activity and the ROS level in the mutant and transgenic plants. (A–C) POD, GR, and SOD were measured in the roots of *sit1-1* (A) and *SIT1-RNAi* (B) rice plants, and in wild-type Col, *SIT1-OE17*, and *SIT1-OE22* *Arabidopsis* seedlings (C) before and after treatment with the indicated concentrations of NaCl. (D) and (E) ROS levels in the roots of Col and *SIT1-OE17* and *SIT1-OE22* with or without 12 h of NaCl treatment. (D) Representative images of CM-H2DCFDA staining. (E) Quantification of the relative fluorescence intensity in the mature zone of the roots shown in (D). Three biological repeats were used for Student's *t*-test. The data represent the mean  $\pm$  SEM ( $n \geq 15$  in [A] and [B];  $n \geq 20$  in [C];  $n \geq 8$  in [E]). \* $P < 0.05$ , \*\* $P < 0.01$

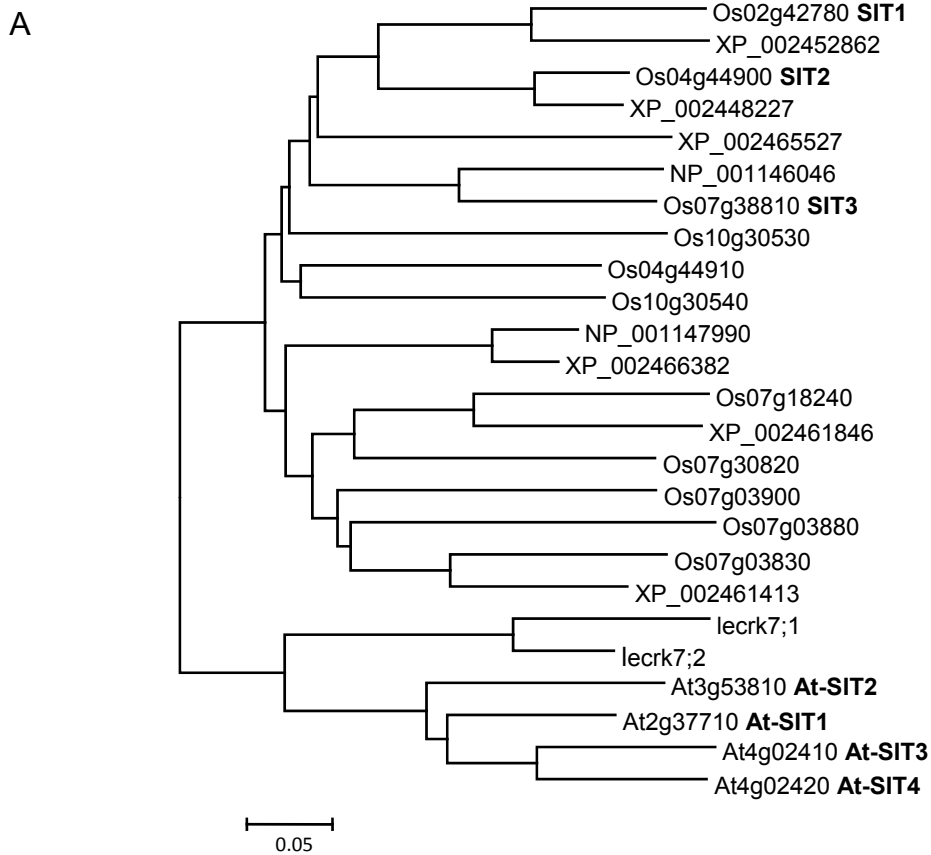

**B**

|         | SIT1 | SIT2 | SIT3 | At-SIT1 | At-SIT2 | At-SIT3 | At-SIT4 |
|---------|------|------|------|---------|---------|---------|---------|
| SIT1    | 100% |      |      |         |         |         |         |
| SIT2    | 68%  | 100% |      |         |         |         |         |
| SIT3    | 59%  | 65%  | 100% |         |         |         |         |
| At-SIT1 | 52%  | 56%  | 55%  | 100%    |         |         |         |
| At-SIT2 | 51%  | 54%  | 53%  | 77%     | 100%    |         |         |
| At-SIT3 | 50%  | 53%  | 52%  | 74%     | 70%     | 100%    |         |
| At-SIT4 | 50%  | 52%  | 54%  | 76%     | 70%     | 78%     | 100%    |

**Supplemental Figure 10.** Sequence similarity matrix of SIT1. (A) A phylogenetic tree of closely-related genes to *SIT1* constructed using MEGA6.06. The full-length amino acid sequence of *SIT1* was compared against the NCBI database; homologs of *SIT1* with >55% identity in monocots and 50% in dicots were selected. On this scale, 0.05 represents a 5% change. (B) Sequence similarity matrix. Amino acid sequence identity of *SIT1* with two rice homologs and four *Arabidopsis* homologs.

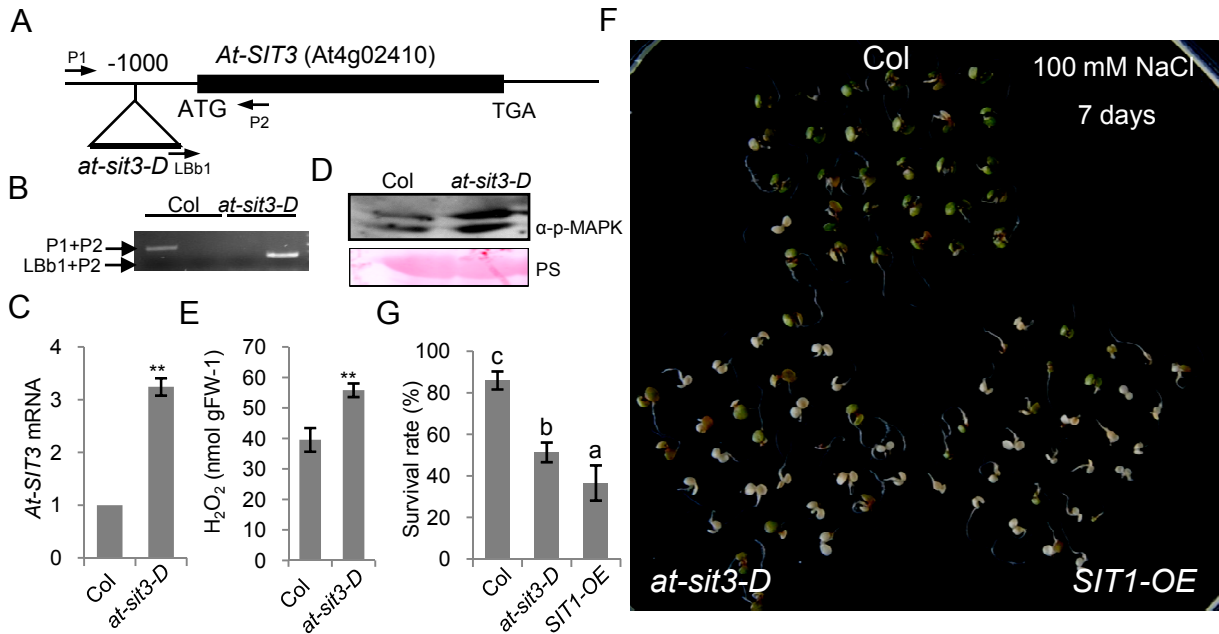

**Supplemental Figure 11.** *At-SIT3*-activation seedlings with increased MPK3 and MPK6 phosphorylation, and an increased level of ROS were sensitive to NaCl. **(A)** Schematic diagram of the T-DNA insertion in *at-sit3-D* (Salk\_079614). The number indicates the insertion site upstream of the start codon. Directed arrows indicate the primers used in **(B)** and **(C)**. **(B)** Genotyping revealed that *at-sit3-D* was homozygous. **(C)** qRT-PCR showed that the expression of *At-SIT3* was enhanced in *at-sit3-D*. **(D)** A immunoblot probed with anti-p-MAPK antibodies showed MAPK phosphorylation in *at-sit3-D*. **(E)** ROS level in *at-sit3-D* and Col plants as quantified using a POD assay kit (see the Methods). **(F)** Phenotypes of Col, *at-sit3-D*, and SIT1-OE plants grown on 0.5× MS medium containing 100 mM NaCl for 7 days. **(G)** Survival rate of the seedlings shown in **(F)**. Seedlings with green cotyledons were judged as alive. The data represent the mean ± SEM of three parallel experiments and analyzed by Student's *t*-test (n=30/genotype). a–c indicate significant differences. \*\*P<0.01.

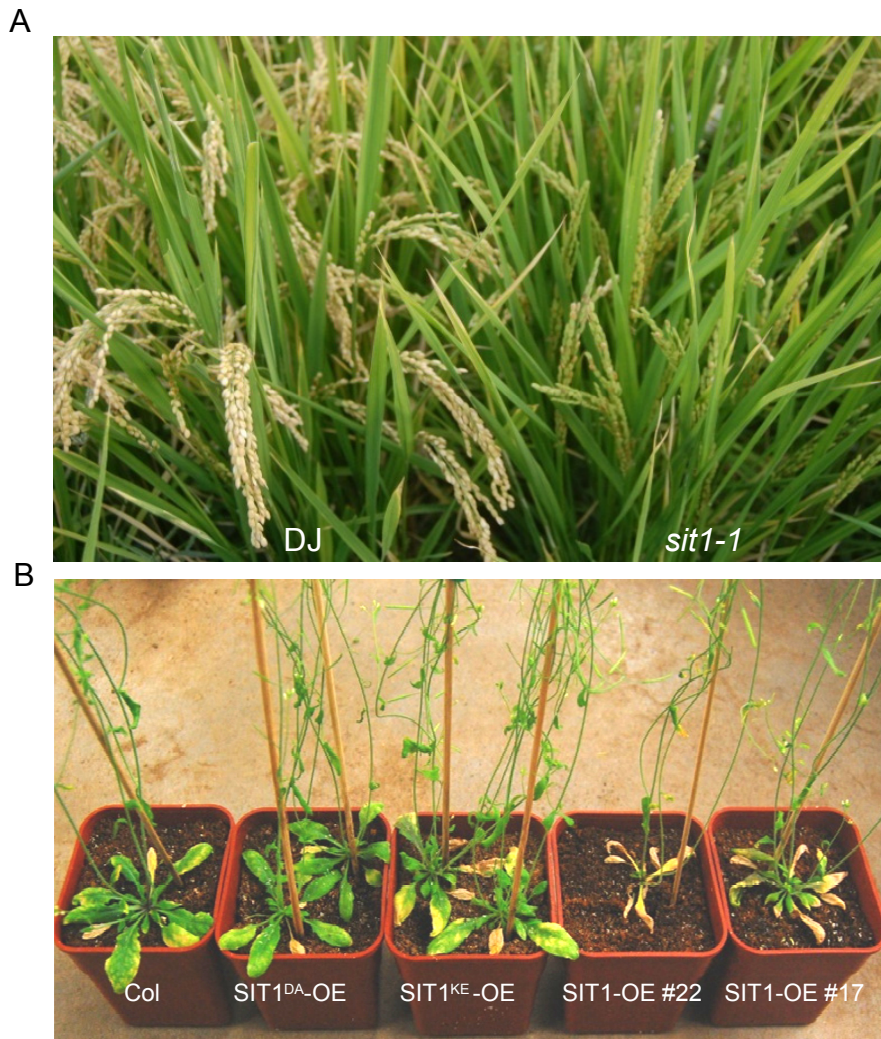

**Supplemental Figure 12.** Phenotypic comparisons among wild-type, *sit1-1* mutant, and *SIT1-OE* plants. (A) *sit1-1* mutant rice showed delayed maturation compared with wild-type (DJ) at harvest stage. (B) *SIT1-OE Arabidopsis* plants displayed early leaf senescence when compared with Col, SIT1<sup>KE</sup>-OE, and SIT1<sup>KD</sup>-OE at the flowering stage.

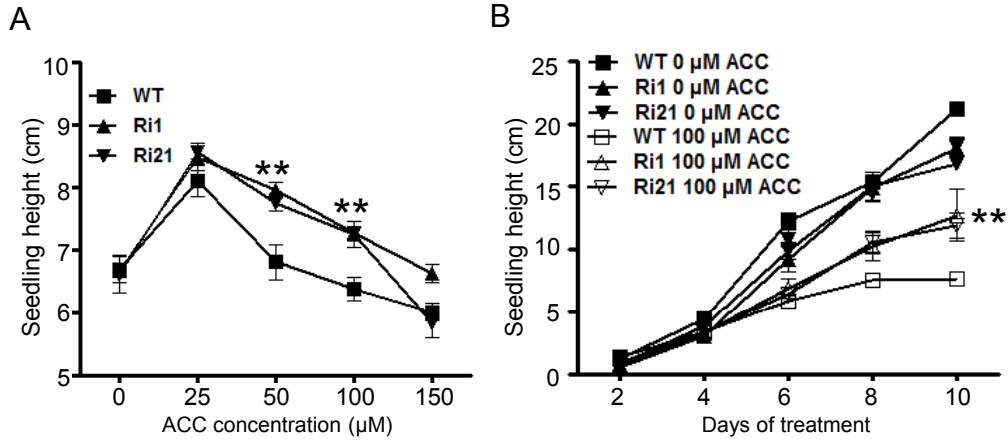

**Supplemental Figure 13.** *S/T1*-RNAi rice seedlings showed reduced sensitivity to exogenous ACC. (A) Effect of increasing the concentration of ACC on seedling height. Five-day-old seedlings grown on 0.5×MS agar medium supplemented with or without ACC were measured. (B) Time-course analysis of seedling height in rice plants grown on 0.5× MS agar medium supplemented with or without 100 μM ACC. Asterisks indicate a significant difference compared to wild type (Jap) by Student's *t*-test. Bars indicate the means ± SEM (n=12, \*\*P<0.01).

Supplemental Table 1. Primers for RNAi construction

| Gene Locus | Primer                               | Primer sequence                     | Purpose                     |
|------------|--------------------------------------|-------------------------------------|-----------------------------|
| Os03g08550 | QRT-F                                | TGGCCCCAGAAGCAAATCT                 | QRT for expression analysis |
|            | QRT-R                                | GAGCGTATTGAGGACAGTAACATCA           |                             |
|            | RNAi-F                               | GGGAATTAAGTAGTTGCTCCGCTACTTCCCCTG   | RNAi construction           |
| RNAi-R     | CGGGATCCGAGCTCTCGATCTCAATCAATGAACCCA |                                     |                             |
| Os09g38850 | QRT-F                                | CACAGCAGCAAGAGCATGGT                | QRT for expression analysis |
|            | QRT-R                                | GGGTAGCTCCAGGAGACATGAT              |                             |
|            | RNAi-F                               | GGGTACCACTAGTACCCTCCAGGTCGTCGACATCT | RNAi construction           |
| RNAi-R     | CGGGATCCGAGCTCTCAAGGCTGAGGAAGTGCACG  |                                     |                             |
| Os09g02250 | QRT-F                                | TGTTGAGTTCTTGATGCTTTGCA             | QRT for expression analysis |
|            | QRT-R                                | GGAAAACCATGGCAAACCA                 |                             |
|            | RNAi-F                               | GGGTACCACTAGTATCCACCCATCAATGGCACG   | RNAi construction           |
| RNAi-R     | CGGGATCCGAGCTCTCCGTCCACCGTCACCA      |                                     |                             |
| Os04g51040 | QRT-F                                | CCATGGTCCTTGACAGTTG                 | QRT for expression analysis |
|            | QRT-R                                | GCAAAGCCTGGAGTTGACG                 |                             |
|            | RNAi-F                               | GGGAATTCAGTAGTTGTCGTTCTGCGCATCAAATG | RNAi construction           |
| RNAi-R     | CGGGATCCGAGCTCCTACAGTAGACAACATTGTTG  |                                     |                             |
| Os02g02120 | QRT-F                                | GAATCTGCGACAACACAATTGG              | QRT for expression analysis |
|            | QRT-R                                | CAGGGCTCTCTTTGGATCTG                |                             |
|            | RNAi-F                               | GGGTACCACTAGTATCCCTACCCCTTCGGCATC   | RNAi construction           |
| RNAi-R     | CGGGATCCGAGCTCTCAAGCACAGTGGGAACCCCT  |                                     |                             |

Supplemental Table 2. Primers used in this study

| Primer       | Nucleotide sequence                   | Purpose                                                  |
|--------------|---------------------------------------|----------------------------------------------------------|
| pSIT1-f      | 5' CCAAGCTTCCAATGGCTGCATTGTTCCAC 3'   | SIT1 promoter amplification                              |
| pSIT1-r      | 5' CGGGATCCGGCGTTTGCGCCAAACTTG 3'     |                                                          |
| SIT1-f       | 5' GCTCTAGATGCGGCGTCCCAGCTAA 3'       | SIT1 coding sequence amplification                       |
| SIT1-r       | 5' GAAGATCTCGCTCGAGGAATGTCA 3'        |                                                          |
| SIT1K386E-f  | 5' GTGGAGATTGCAGTGGAGAAGGTATCCCACG 3' | SIT1 <sup>KE</sup> and SIT1KD <sup>KE</sup> construction |
| SIT1K386E-r  | 5' CCACTGCAATCTCCACTCGGGATACCAGTA 3'  |                                                          |
| SIT1D482A-f  | 5' CAAGTCGTTCTGCATCGAGCCATCAAGGCA 3'  | SIT1 <sup>DA</sup> and SIT1KD <sup>DA</sup> construction |
| SIT1D482A-r  | 5' CGTCCAACAATACGTTGCTTGCCTTGATGT 3'  |                                                          |
| SIT1KD-f     | 5' CACCAGACGACGCAGGTATGCGGA 3'        | SIT1KD construction                                      |
| SIT1KD-r     | 5' TCATCTCGCTCGAGGAATGT 3'            |                                                          |
| SIT1P1       | 5' CGTCCGCAGGTAACCTCTAG 3'            | SIT1 mutant identification                               |
| SIT1P2       | 5' GTGAACATGAGCCTGCTCAG 3'            |                                                          |
| SIT2P1       | 5' AGGATGGTGTGCGAACTCCAC 3'           | SIT2 mutant identification                               |
| SIT2P2       | 5' CGAGGTGACCCACAGGATAT 3'            |                                                          |
| 2715LB       | 5' ACGTCCGCAATGTGTTATTAA 3'           | T-DNA left primer for rice mutant identification         |
| QSIT1-f      | 5' ATGCAAATCAGATGGGCAACT 3'           | QRT for SIT1 expression                                  |
| QSIT1-r      | 5' CGAAGAGACTAAAACCTTGTGGTCAT 3'      |                                                          |
| QSIT2-f      | 5' CCGGATGTAGTTAATCAGTACCTAACTAGTA 3' | QRT for SIT2 expression                                  |
| QSIT2-r      | 5' TCGTAACACCACTTACATCATAGATAAAC 3'   |                                                          |
| QSIT3-f      | 5' CAAGGAGTTCAACCGCAATTC 3'           | QRT for SIT3 expression                                  |
| QSIT3-r      | 5' TCACGAGCTCCCTTCCTTTG 3'            |                                                          |
| Hyg-f        | 5' AAGTTCGACAGCGTCTCCGAC 3'           | Transgenic plant identification                          |
| Hyg-r        | 5' TCTACACAGCCATCGGTCCAG 3'           |                                                          |
| At-SIT3P1    | 5' TGTTGGTCAAAGGAAAAGTCG 3'           | At-SIT3 mutant identification                            |
| At-SIT3P2    | 5' TCAATGGGCATGCTCTAAGAC 3'           |                                                          |
| LBb1         | 5' GCGTGGACCGCTTGCTGCAACT 3'          | T-DNA left primer for rice mutant identification         |
| Qat-SIT3-f   | 5' CGCTTTCTACACCGAACCAATC 3'          | QRT for At-SIT3 expression                               |
| Qat-SIT3-r   | 5' TCGGGATCCCAGAGTAGATACC 3'          |                                                          |
| QACS2-f      | 5'GGAGGGCGTCTCGCAGTT3'                | QRT for Os-ACS2expression                                |
| QACS2-r      | 5'CCCTCACCTGCCCATAAA 3'               |                                                          |
| QERF1-f      | 5'TCGAACACACCACACACTGAAG 3'           | QRT for Os-ERF1 expression                               |
| QERF1-r      | 5'GTGGTTCCGCAACATGCTT 3'              |                                                          |
| QMAPK5a-f    | 5'AACCCGCTGCAGAGAATCAC 3'             | QRT for Os-MAPK5a expression                             |
| QMAPK5a-r    | 5'GAGAAGGGCTCCAGGCAGAT 3'             |                                                          |
| QERF3-f      | 5'AGGCTGGATACCGTATGATGAAG3'           | QRT for Os-ERF3 expression                               |
| QERF3-r      | 5'TGACGGCGCGAGATCAA3'                 |                                                          |
| QEBP1-f      | 5'CTGCTGCAAAGTCTGCCAAA 3'             | QRT for Os-EBP1 expression                               |
| QEBP1-r      | 5'CTTGCGAGGATCTCTGATTTCA 3'           |                                                          |
| QOs-DREB1A-f | 5'GGAATCAGGAGCAAGCAGAAA3'             | QRT for Os-DREB1A expression                             |
| QOs-DREB1A-r | 5'CGACTCGCCGCTCATCTC3'                |                                                          |
